# Supplementary material
Source: MDPI journal article supplement (https://www.mdpi.com/2073-4344/11/11/1350)
Supplement: s1 [file s1]

# Enzymatic Production of Ecodiesel by Using a Commercial Lipase CALB, Immobilized by Physical Adsorption on Mesoporous Organosilica Materials

Carlos Luna <sup>1</sup>, Victoria Gascón-Pérez <sup>2</sup>, Francisco J. López-Tenllado <sup>1</sup>, Felipa M. Bautista <sup>1</sup>, Cristóbal Verdugo-Escamilla <sup>3</sup>, Laura Aguado-Deblas <sup>1</sup>, Juan Calero <sup>1</sup>, Antonio A. Romero <sup>1</sup>, Diego Luna <sup>1,\*</sup> and Rafael Estévez <sup>1</sup>

**Citation:** Luna, C.; Gascón-Pérez, V.; López-Tenllado, F.J.; Bautista, F.M.; Verdugo-Escamilla, C.; Aguado-Deblas, L.; Calero, J.; Romero, A.A.; Luna, D.; Estévez, R. Enzymatic Production of Ecodiesel by Using a Commercial Lipase CALB, Immobilized by Physical Adsorption on Mesoporous Organosilica Materials. *Catalysts* **2021**, *11*, 1350. <https://doi.org/10.3390/catal11111350>

Academic Editors:  
Aniello Costantini and  
Valeria Califano

Received: 5 October 2021  
Accepted: 8 November 2021  
Published: 9 November 2021

**Publisher's Note:** MDPI stays neutral with regard to jurisdictional claims in published maps and institutional affiliations.

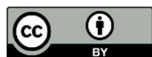

**Copyright:** © 2021 by the authors. Licensee MDPI, Basel, Switzerland. This article is an open access article distributed under the terms and conditions of the Creative Commons Attribution (CC BY) license (<https://creativecommons.org/licenses/by/4.0/>).

<sup>1</sup> Departamento de Química Orgánica, Universidad de Córdoba, Campus de Rabanales, Ed. Marie Curie, 14014 Córdoba, Spain; qo2luduc@uco.es (C.L.); b52lotef@uco.es (F.J. L.-T.); qo1baruf@uco.es (F.M.B.); aguadolaura8@gmail.com (L.A.-D.); p72camaj@gmail.com (J.C.); qo1rorea@uco.es (A.A.R.); q72estor@uco.es (R.E.)

<sup>2</sup> Department of Chemical Sciences, Bernal Institute, University of Limerick, V94 T9PX Limerick, Ireland; Victoria.GasconPerez@ul.ie

<sup>3</sup> Laboratorio de Estudios Cristalográficos, Spanish National Research Council (CSIC), Andalusian Institute of Earth Sciences (IACT), Universidad de Granada, Av. De las Palmeras 4, E-18100 Granada, Spain; cristobal.verdugo@csic.es

\* Correspondence: diego.luna@uco.es; Tel.: +34-957-212-065

**Abstract:** The synthesis of two biocatalysts based on a commercial *Candida antarctica* lipase B, CALB enzyme (E), physically immobilized on two silica supports, was carried out. The first support was a periodic mesoporous organosilica (PMO) and the second one was a commercial silica modified with octyl groups (octyl-MS3030). The maximum enzyme load was 122 mg enzyme/g support on PMO and 288 mg enzyme/g support on octyl-MS3030. In addition, the biocatalytic efficiency was corroborated by two reaction tests based on the hydrolysis of p-nitrophenylacetate (p-NPA) and tributyrin (TB). The transesterification of sunflower oil with ethanol was carried out over the biocatalysts synthesized at the following reaction conditions: 6 mL sunflower oil, 1.75 mL EtOH, 30 °C, 25 µL NaOH 10 N and 300 rpm, attaining conversion values over 80% after 3 h of reaction time. According to the results obtained, we can confirm that these biocatalytic systems are viable candidates to develop, optimize and improve a new methodology to achieve the integration of glycerol in different monoacylglycerol molecules together with fatty acid ethyl esters (FAEE) molecules to obtain Ecodiesel.

**Keywords:** biofuel; ecodiesel; biodiesel; commercial CALB lipase; ordered mesoporous materials (PMO); amorphous siliceous material MS3030

**Table S1.** Textural properties of the supports employed for the enzyme immobilization.

| Support      | S <sub>BET</sub> (m <sup>2</sup> /g) | Pore Volume (cm <sup>3</sup> /g) | Pore Diameter (nm) |
|--------------|--------------------------------------|----------------------------------|--------------------|
| PMO          | 882                                  | 1.0                              | 7.1                |
| MS3030       | 305                                  | 2.9                              | 27.9               |
| Octyl-MS3030 | 254                                  | 2.2                              | 25.0               |
